# Supplementary material for: Effect of Extracurricular After-School Physical Activities on Academic Performance of Schoolchildren: A Cluster Randomized Clinical Trial
Source: PubMed Central journal article supplement (PMC10507588; doi:10.1001/jamapediatrics.2023.3615), 2023-09-18
Supplement: jamapediatr-e233615-s002.pdf [file jamapediatr-e233615-s002.pdf]

## Supplementary Online Content

Wang D, Xiong R, Zhang J, et al. Effect of extracurricular after-school physical activities on academic performance of schoolchildren: a cluster randomized clinical trial. *JAMA Pediatr*. Published online September 18, 2023.  
doi:10.1001/jamapediatrics.2023.3615

**eTable 1.** Compliance With the Extracurricular Physical Activities in the Intervention Group

**eTable 2.** Percentages of Extracurricular Physical Activities Implemented Outdoors, Indoors, and in Semi-Open Spaces in the Intervention Group

**eTable 3.** Per-Protocol Analysis of Changes in Mathematic Scores and Physical Fitness After 1 Academic Year Between the Intervention and Control Groups

This supplementary material has been provided by the authors to give readers additional information about their work.

eTable 1. Compliance with the extracurricular physical activities in the intervention group.

| Grade        | Term            | Month for intervention | Number of scheduled sessions | Number of successful sessions | Number of unsuccessful sessions due to weather | Number of unsuccessful sessions due to school events | Compliance, % |
|--------------|-----------------|------------------------|------------------------------|-------------------------------|------------------------------------------------|------------------------------------------------------|---------------|
| 3            | 2020 last term  | Oct/Nov/Dec/Jan        | 1111                         | 1072                          | 32                                             | 7                                                    | 96.5          |
| 3            | 2021 first term | Feb/Mar/Apr/May/June   | 1256                         | 1207                          | 40                                             | 9                                                    | 96.1          |
| 4            | 2020 last term  | Oct/Nov/Dec/Jan        | 1111                         | 1072                          | 32                                             | 7                                                    | 96.5          |
| 4            | 2021 first term | Feb/Mar/Apr/May/June   | 1246                         | 1197                          | 40                                             | 9                                                    | 96.1          |
| <b>Total</b> |                 |                        | 4724                         | 4548                          | 144                                            | 32                                                   | 96.3          |

eTable 2. Percentages of extracurricular physical activities implemented outdoors, indoors, and in semi-open spaces in the intervention group.

| Grade        | Term            | Month for intervention | Number of successful sessions | Number of outdoor sessions | Number of sessions implemented in semi-open spaces | Number of indoor sessions | Rate of outdoor sessions, % |
|--------------|-----------------|------------------------|-------------------------------|----------------------------|----------------------------------------------------|---------------------------|-----------------------------|
| 3            | 2020 last term  | Oct/Nov/Dec/Jan        | 1072                          | 859                        | 103                                                | 110                       | 80.1                        |
| 3            | 2021 first term | Feb/Mar/Apr/May/June   | 1207                          | 960                        | 156                                                | 91                        | 79.5                        |
| 4            | 2020 last term  | Oct/Nov/Dec/Jan        | 1072                          | 858                        | 103                                                | 111                       | 80.0                        |
| 4            | 2021 first term | Feb/Mar/Apr/May/June   | 1197                          | 949                        | 156                                                | 92                        | 79.3                        |
| <b>Total</b> |                 |                        | 4548                          | 3626                       | 518                                                | 404                       | 79.7                        |

eTable 3. Per-protocol analysis of changes in mathematic scores and physical fitness after 1 academic year between the intervention and control groups.

|                                        | Study group, N (%) |               | Mean Difference<br>(95%CI) <sup>a</sup> | P Value            |
|----------------------------------------|--------------------|---------------|-----------------------------------------|--------------------|
|                                        | Intervention       | Control       |                                         |                    |
| <b>Mathematics scores</b>              |                    |               |                                         |                    |
| All participants                       | 952 (50.0)         | 951(50.0)     | 1903 (100)                              |                    |
| Baseline                               | 74.64 (16.90)      | 74.94 (16.43) | -0.30 (-1.76, 1.17)                     |                    |
| 1 academic year                        | 78.78 (17.75)      | 77.70 (16.33) | 1.07 (-0.37, 2.52)                      | 0.48               |
| 1 academic year - baseline             | 4.14 (13.21)       | 2.77 (14.87)  | 1.37 (0.13, 2.61)                       |                    |
| <b>Overall Physical fitness scores</b> |                    |               |                                         |                    |
| All participants                       | 952 (50.0)         | 951(50.0)     | 1903 (100)                              |                    |
| Baseline                               | 68.69 (9.02)       | 68.89 (9.02)  | -0.20 (-1.07, 0.66)                     |                    |
| 1 academic year                        | 78.15 (7.12)       | 75.51 (7.79)  | 2.64 (1.93, 3.35)                       | 0.002 <sup>c</sup> |
| 1 academic year - baseline             | 9.52 (6.07)        | 6.72 (7.45)   | 2.80 (2.14, 3.47)                       |                    |
| <b>Prevalence of myopia</b>            |                    |               |                                         |                    |
| All participants <sup>b</sup>          | 730 (48.9)         | 764 (51.1)    | 1494 (100)                              |                    |
| Baseline                               | 89 (12.2)          | 95 (12.4)     | -0.24 (-8.99, 8.94)                     |                    |
| 1 academic year                        | 137 (18.8)         | 156 (20.4)    | -1.65 (-12.34, 9.56)                    |                    |
| <b>Incidence of myopia</b>             | 48/641 (7.5)       | 61/669 (9.1)  | -1.63 (-9.69, 6.26)                     | >0.99 <sup>c</sup> |

Data are mean (standard deviation).

<sup>a</sup> Linear regression models assessed the differences between the 2 groups in the mathematics scores and physical fitness scores at baseline and at the end of 1 academic year, as well as changes in these variables after 1 academic year. All analyses took into account cluster effects within schools.

<sup>b</sup> Children with ocular abnormalities, unsuccessful cycloplegia at baseline and follow-up visit, and lost to follow-up were excluded from the analysis. The differences in the prevalence and incidence of myopia were compared by proportional Z tests adjusting for cluster effect.

<sup>c</sup> Bonferroni correction was applied to multiple comparisons for secondary outcomes (physical fitness scores and myopia incidence), and the corrected P value was presented.
