# Supplementary material for: Effect of Extracurricular After-School Physical Activities on Academic Performance of Schoolchildren: A Cluster Randomized Clinical Trial
Source: PubMed Central journal article supplement (PMC10507588; doi:10.1001/jamapediatrics.2023.3615), 2023-09-18
Supplement: jamapediatr-e233615-s003.pdf [file jamapediatr-e233615-s003.pdf]

## Data Sharing Statement

Wang. Effect of Extracurricular After-School Physical Activities on Academic Performance of Schoolchildren. *JAMA Pediatr.* Published September 18, 2023.

doi:10.1001/jamapediatrics.2023.3615

### Data

**Data available:** Yes

**Data types:** Deidentified participant data

**How to access data:** All data will be available from the corresponding authors, contacted at [zengyangfa@qq.com](mailto:zengyangfa@qq.com)

**When available:** With publication

### Supporting Documents

**Document types:** None

### Additional Information

**Who can access the data:** researchers whose proposed use of the data has been approved

**Types of analyses:** For a specified purpose

**Mechanisms of data availability:** with a signed data access agreement
